# Supplementary material for: Type IX Secretion System Cargo Proteins Are Glycosylated at the C Terminus with a Novel Linking Sugar of the Wbp/Vim Pathway
Source: PubMed Central journal article supplement (PMC7468200; doi:10.1128/mbio.01497-20), 2020-09-01
Supplement: mBio.01497-20-sf001.pdf [file mBio.01497-20-sf001.pdf]

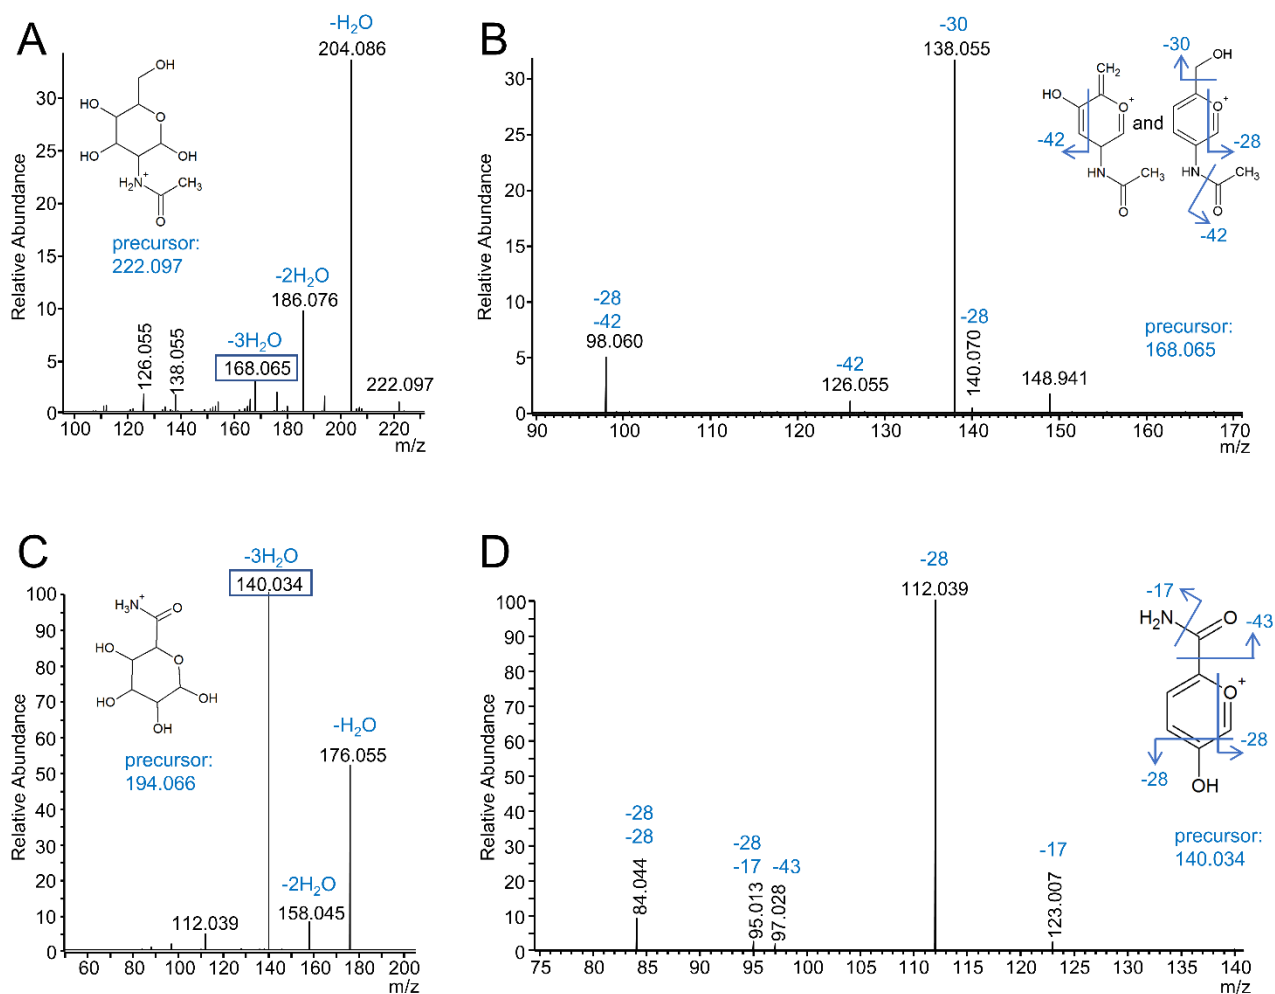

**Figure S1: MS<sup>n</sup> of N-acetyl glucosamine and glucuronamide.** A, MS<sup>2</sup> spectrum of N-acetyl glucosamine showing losses of one, two and three water molecules. The boxed product ion ( $m/z$  168.065) was targeted for MS<sup>4</sup> analysis. B, MS<sup>4</sup> spectrum of  $m/z$  168 (222.0900@cid30.00 204.0800@cid30.00 168.0600@cid30.00). C, MS<sup>2</sup> spectrum of glucuronamide showing losses of one, two and three water molecules. The boxed product ion ( $m/z$  140.034) was targeted for MS<sup>3</sup> analysis. D, MS<sup>3</sup> spectrum of  $m/z$  140 (194.0600@cid50.00 140.0340@cid25.00). The proposed structure and fragmentation of the dehydrated parent ions are shown. Both spectra were acquired by direct infusion into the Orbitrap Lumos instrument.
