# Supplementary material for: Type IX Secretion System Cargo Proteins Are Glycosylated at the C Terminus with a Novel Linking Sugar of the Wbp/Vim Pathway
Source: PubMed Central journal article supplement (PMC7468200; doi:10.1128/mbio.01497-20), 2020-09-01
Supplement: mBio.01497-20-sf002.pdf [file mBio.01497-20-sf002.pdf]

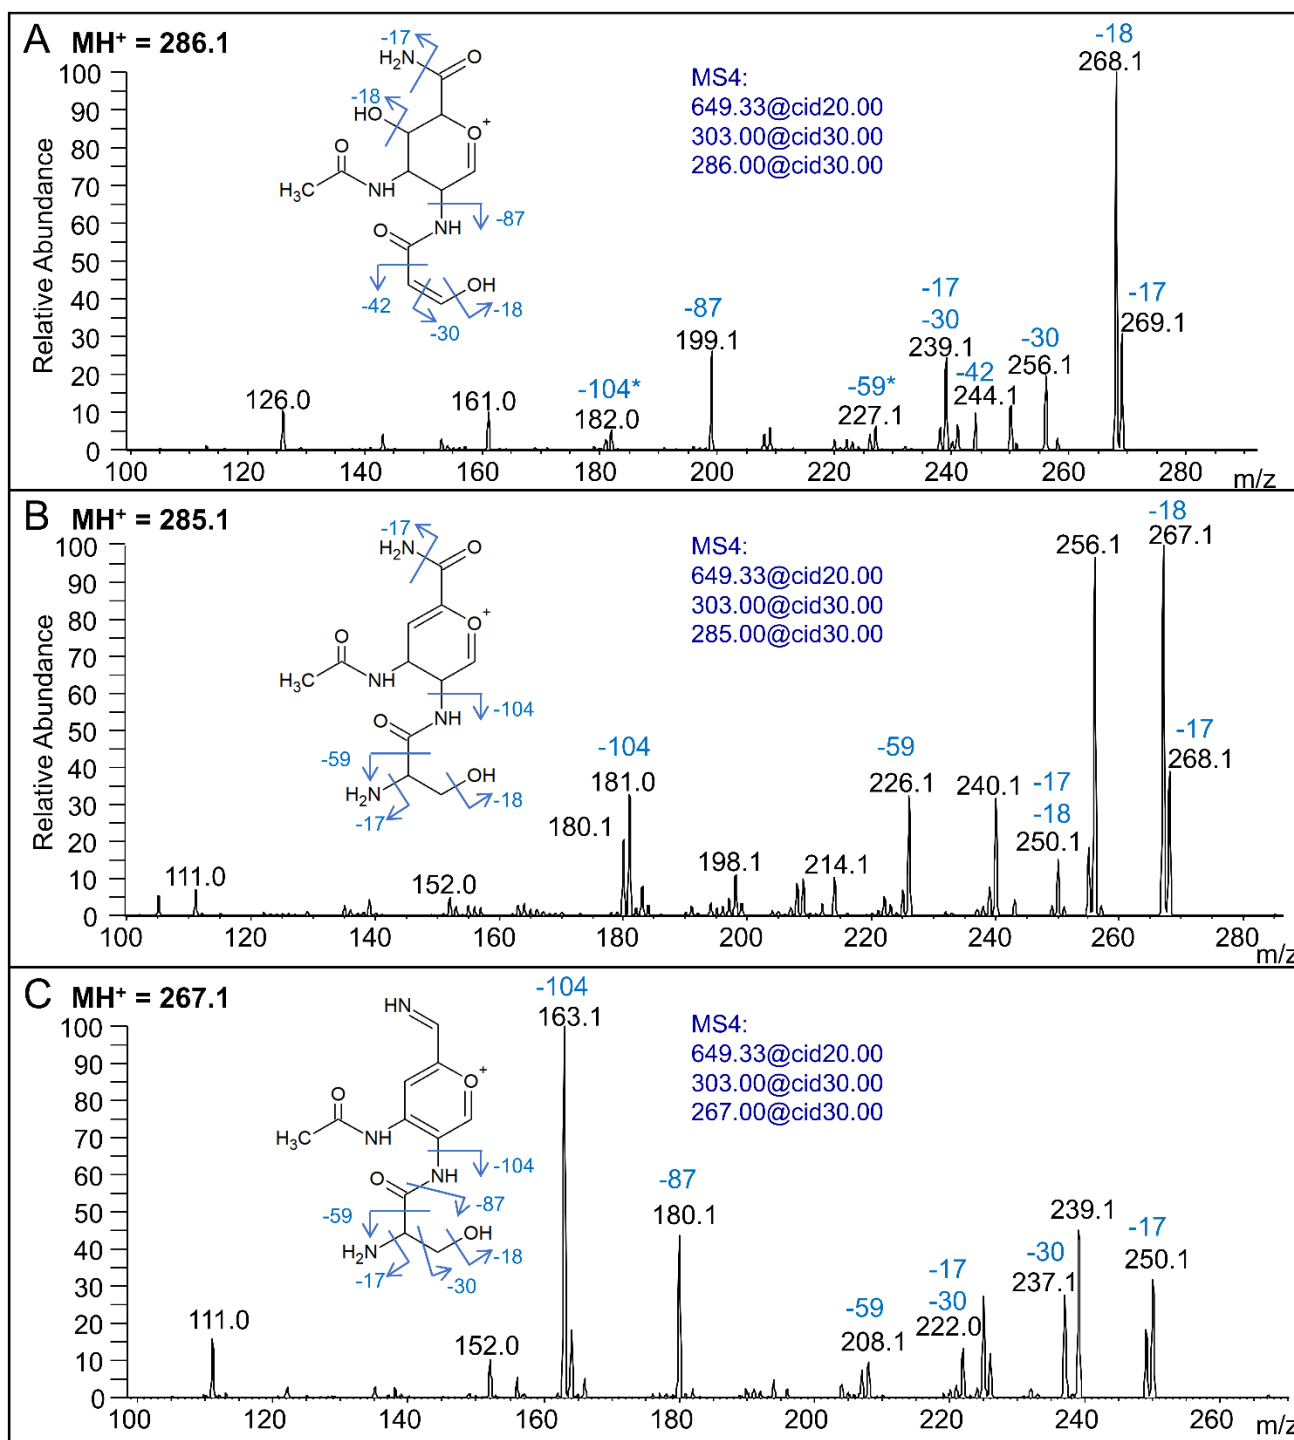

**Figure S2. Additional spectra (MS<sup>4</sup>) to determine the component I structure in *P. gingivalis*.** The proposed structure and fragmentation of the precursor ions are shown. All spectra were acquired by direct infusion into the FTICR instrument.
