# Supplementary material for: Type IX Secretion System Cargo Proteins Are Glycosylated at the C Terminus with a Novel Linking Sugar of the Wbp/Vim Pathway
Source: PubMed Central journal article supplement (PMC7468200; doi:10.1128/mbio.01497-20), 2020-09-01
Supplement: mBio.01497-20-sf004.pdf [file mBio.01497-20-sf004.pdf]

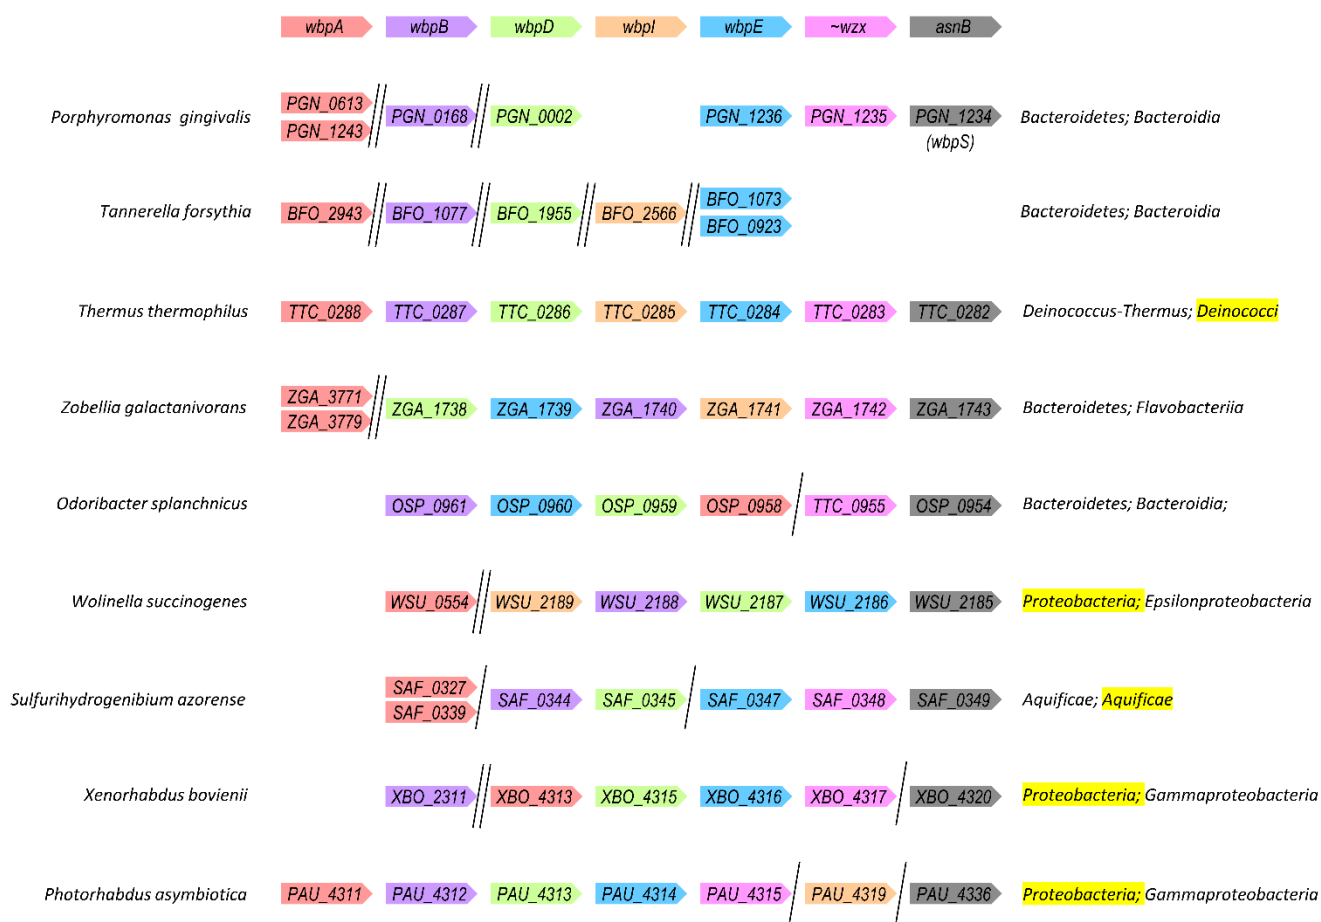

**Figure S4. Gene organization of the *wbp* locus in various species.** The species is indicated on the left, and the *Phylum*; *Class* taxonomic designations are shown on the right hand side. Genes are color-coded according to the scheme shown on the top row. Genes are directly adjacent unless separated by a single slash (nearby gene) or double slash (distant gene).
