# Supplementary material for: Type IX Secretion System Cargo Proteins Are Glycosylated at the C Terminus with a Novel Linking Sugar of the Wbp/Vim Pathway
Source: PubMed Central journal article supplement (PMC7468200; doi:10.1128/mbio.01497-20), 2020-09-01
Supplement: mBio.01497-20-sf005.pdf [file mBio.01497-20-sf005.pdf]

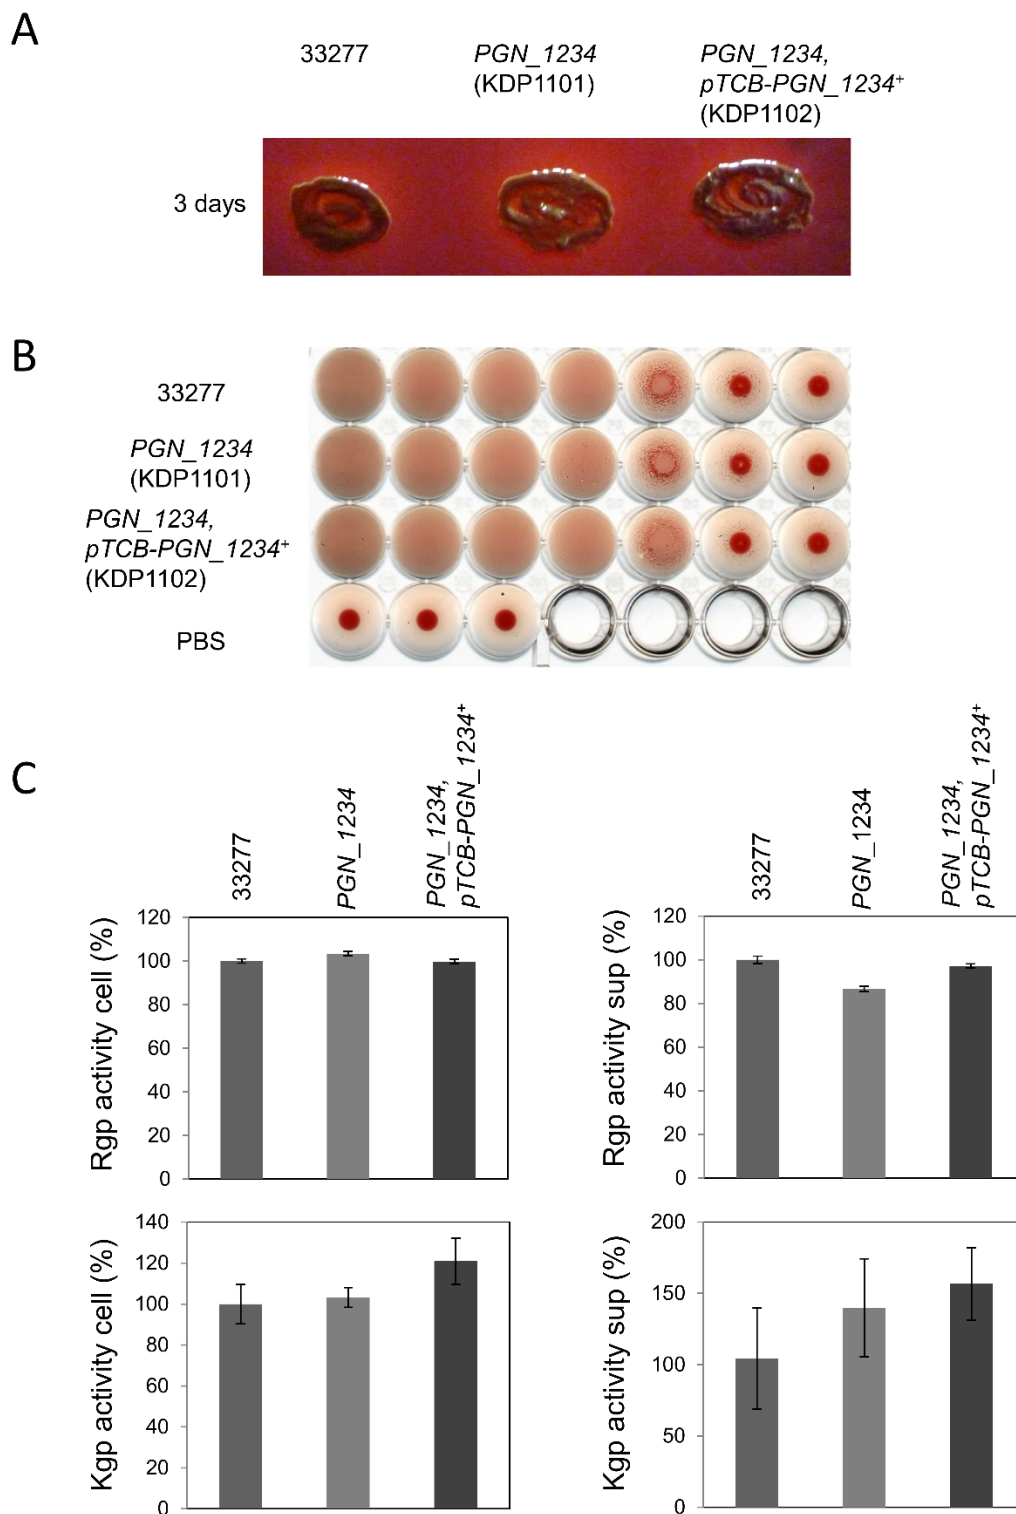

**Figure S5. Characterisation of PGN\_1234 mutant**

**A.** Black pigmentation of *P. gingivalis* strains grown 3 days on blood agar. **B.** Hemagglutination assay for *P. gingivalis* strains mixed with defibrinated sheep red blood cells. **C.** Cell surface (cell) and culture supernatant (sup) Rgp and Kgp gingipain proteolytic activities relative the ATCC 33277 wild type strain.
