# Supplementary material for: Type IX Secretion System Cargo Proteins Are Glycosylated at the C Terminus with a Novel Linking Sugar of the Wbp/Vim Pathway
Source: PubMed Central journal article supplement (PMC7468200; doi:10.1128/mbio.01497-20), 2020-09-01
Supplement: mBio.01497-20-sf006.pdf [file mBio.01497-20-sf006.pdf]

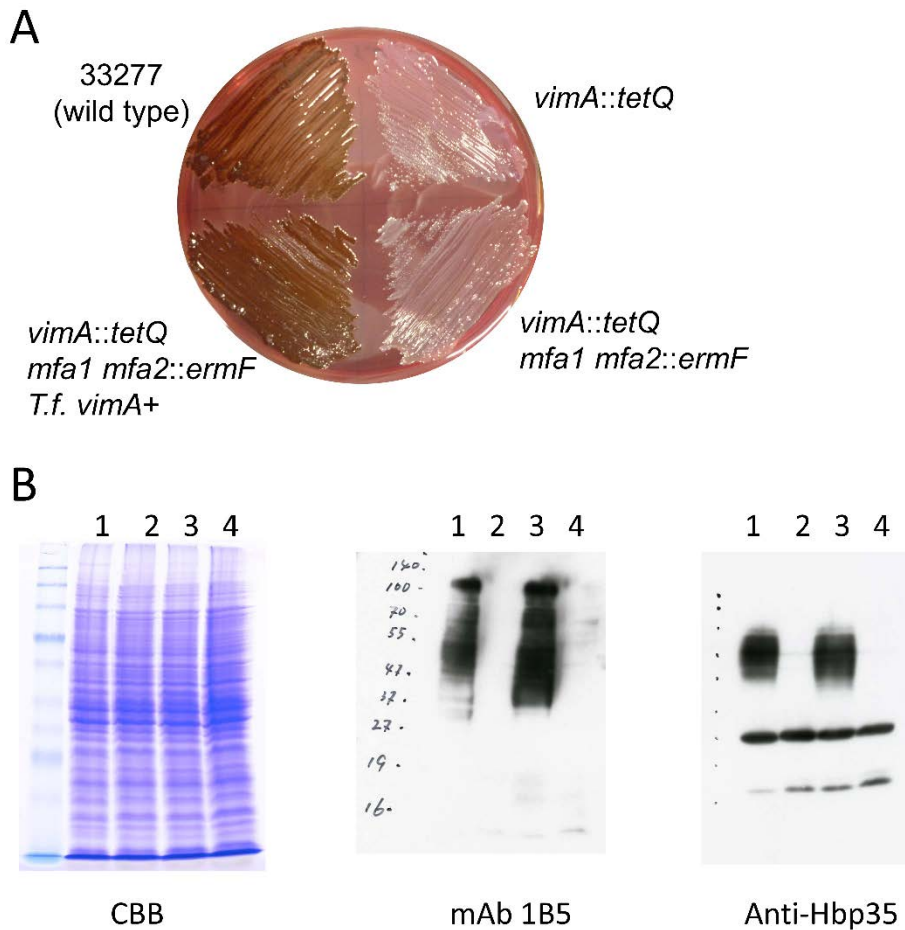

**Figure S6. The cross species complementation with the *vimA* gene from *T. forsythia* can rescue the *P. gingivalis* *vimA* deficit mutant.** **A.** Colony pigmentation after 3 days of growth. **B.** SDS PAGE (10%) of whole cell lysates of *P. gingivalis* strains and stained with Coomassie Blue (CBB) or subjected to Western blot (mAb 1B5 or anti-Hbp35). Lane 1, ATCC 33277; lane 2, KDP202 (*vimA::tetQ*); lane 3, KDP1103 (*vimA::tetQ mfa1Nmfa2C::ermF-p-vimA(Tf)<sup>+</sup>*); lane 4, KDP1104 (*vimA::tetQ mfa1Nmfa2C::ermF*).
