# Supplementary material for: Type IX Secretion System Cargo Proteins Are Glycosylated at the C Terminus with a Novel Linking Sugar of the Wbp/Vim Pathway
Source: PubMed Central journal article supplement (PMC7468200; doi:10.1128/mbio.01497-20), 2020-09-01
Supplement: mBio.01497-20-sf007.pdf [file mBio.01497-20-sf007.pdf]

Figure S7. Arrangement of selected genetic loci containing VimA-related proteins.  
This figure includes the following 6 pages.

# Nitrosomonas eutropha C91

## Nitrosomonas eutropha C91, complete genome

GenBank: CP000450.1

[GenBank](#) [FASTA](#)

[Link To This View](#) [Feedback](#)

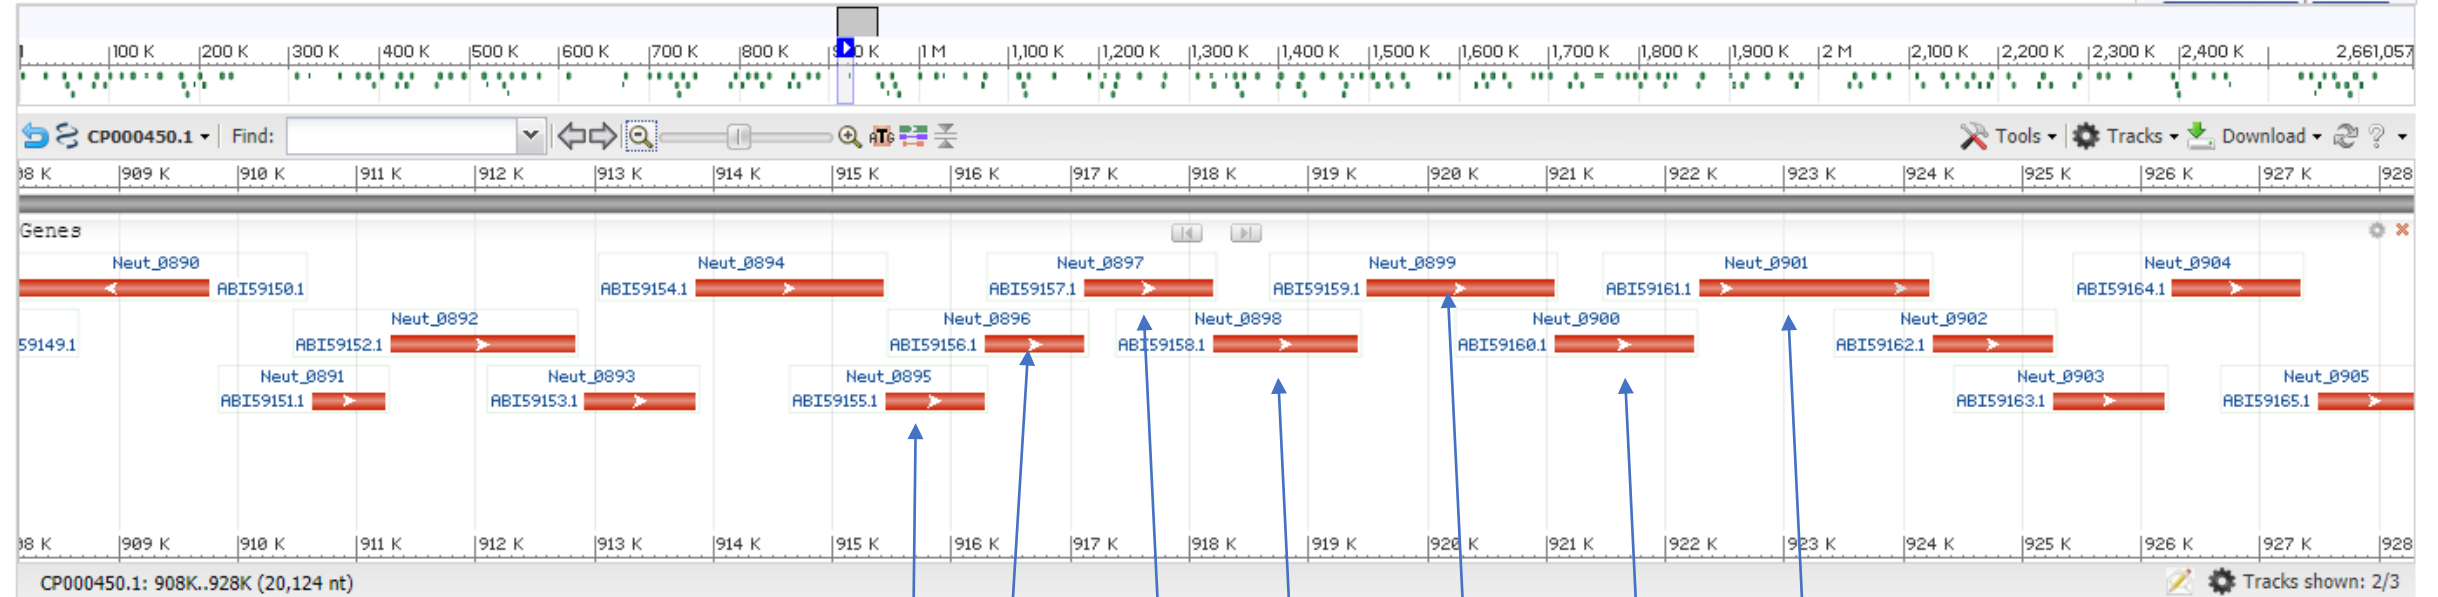

[https://www.ncbi.nlm.nih.gov/nuccore/CP000450.1?report=graph&log\\$=seqview](https://www.ncbi.nlm.nih.gov/nuccore/CP000450.1?report=graph&log$=seqview)

# Nitrosococcus oceani ATCC 19707, complete genome

GenBank: CP000127.1

[GenBank](#) [FASTA](#)

[Link To This View](#) | [Feedback](#)

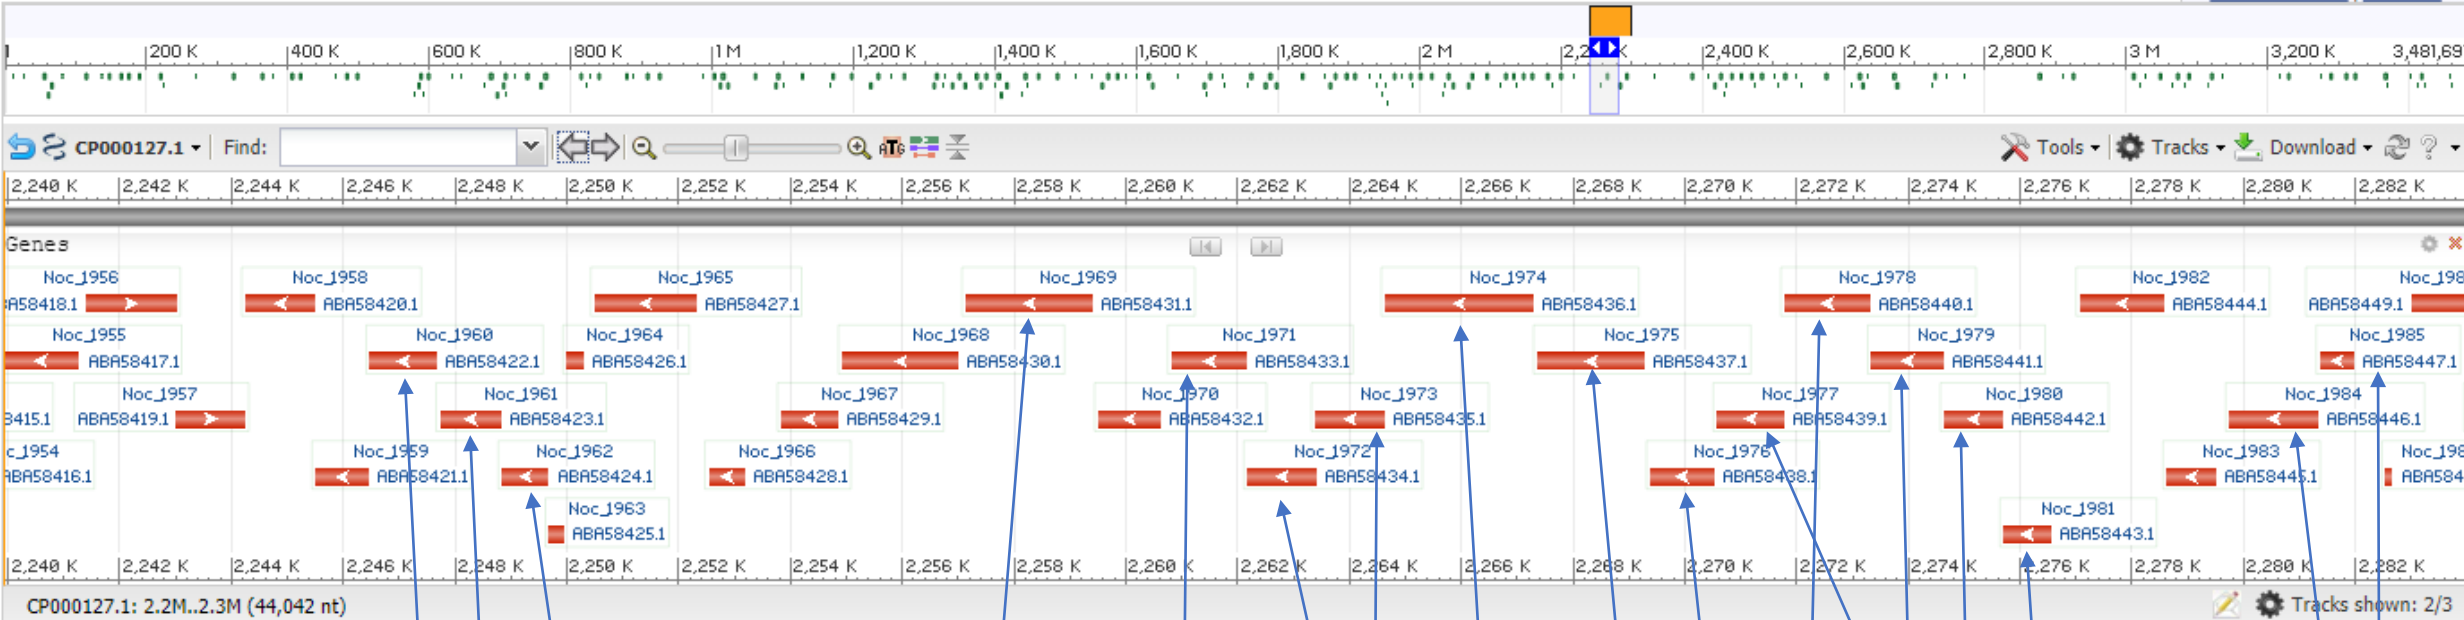

Amino-transferase (PorR?)

hydrolase

Acetyl-transferase

“heparinase”

CapK

Glycosyl transferase

??

AsnB

UDP-N-acetylglucosamine 2-epimerase

EpsH

Glycosyl transferase

VimA

PS deacetylase

PS chain length determining protein

PS export

# Desulfovibrio vulgaris DP4 plasmid pDVUL01, complete sequence

GenBank: CP000528.1

[GenBank](#) [FASTA](#)

[Link To This View](#) | [Feedback](#)

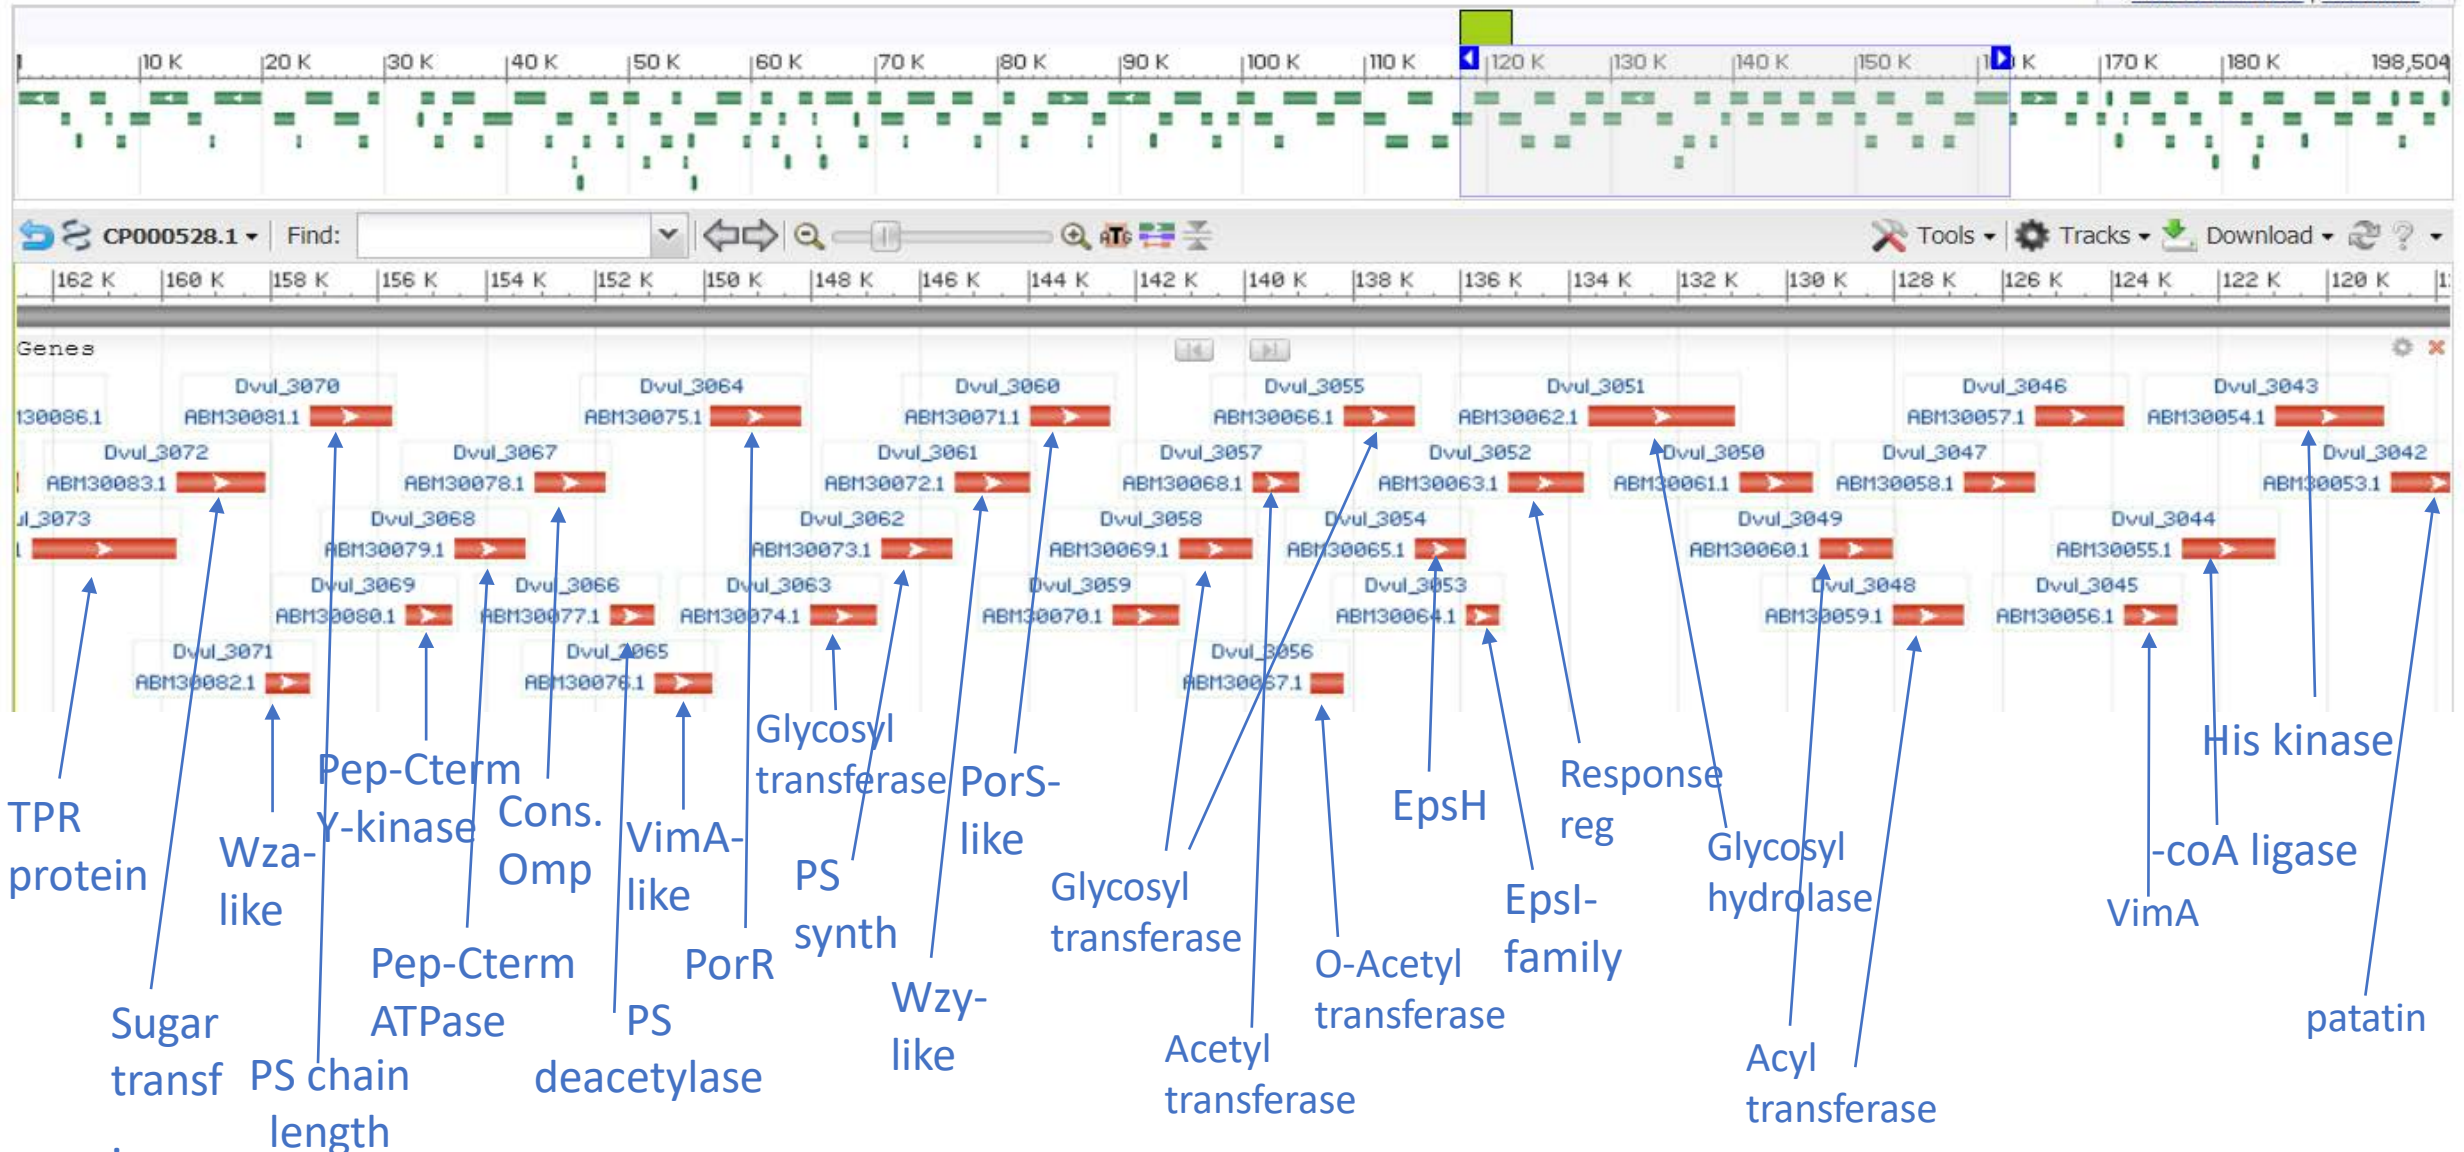

<https://www.ncbi.nlm.nih.gov/nucore/CP000528.1?report=graph&from=122769&to=123776&strand=true>

# Pseudomonas mosselii strain SC006 Scaffold4

## Pseudomonas mosselii strain SC006 Scaffold4, whole genome shotgun sequence

GenBank: VAUO01000004.1

[GenBank](#) [FASTA](#)

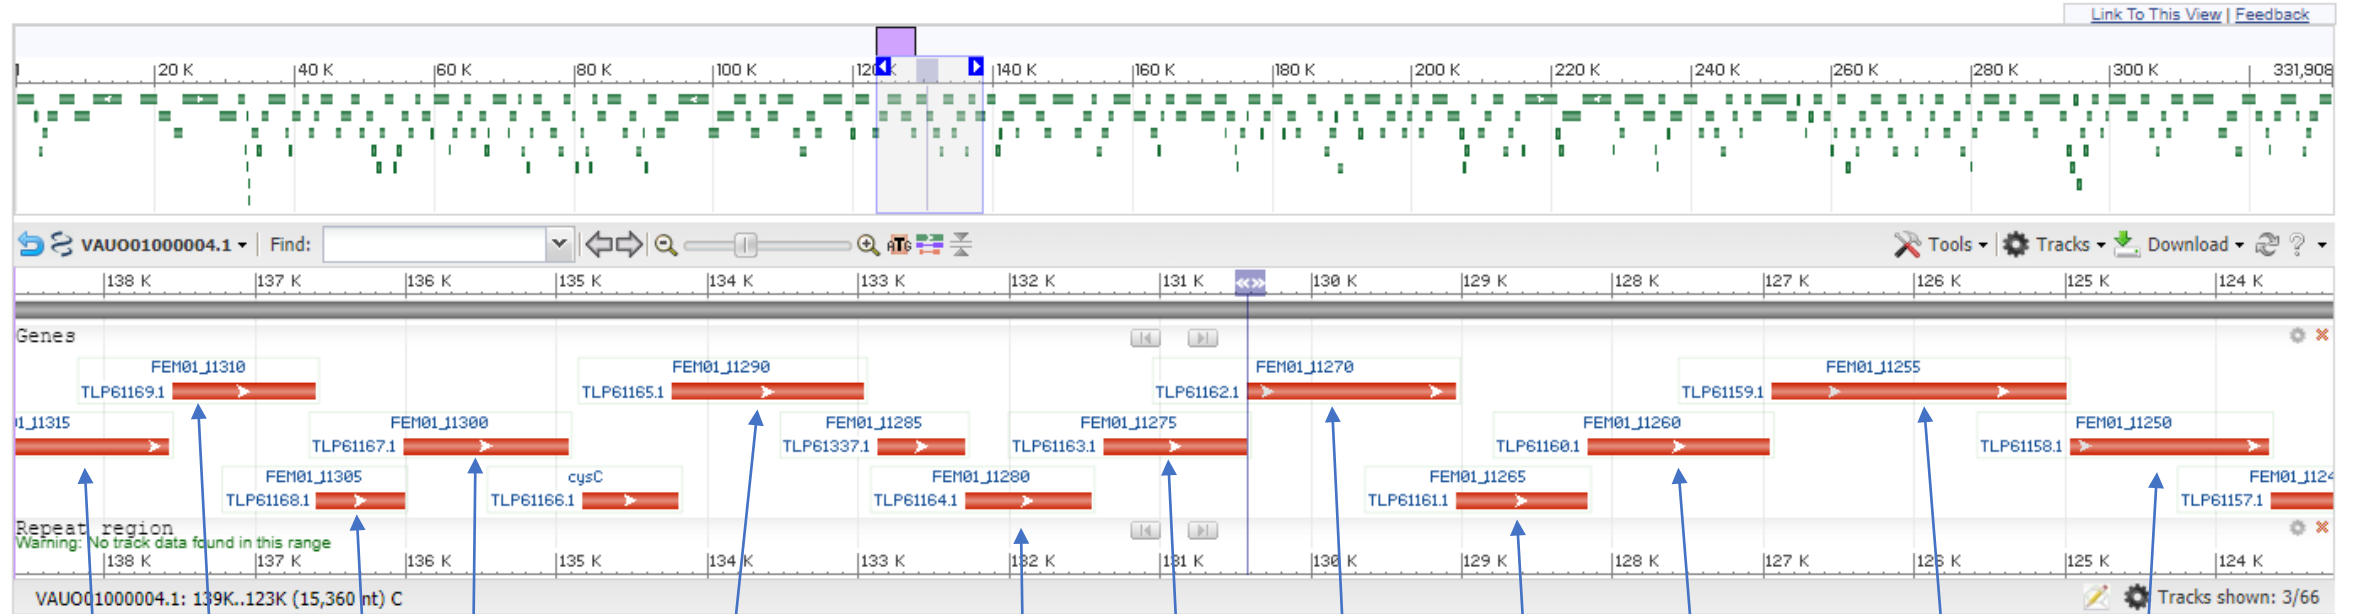

WbpA  
WbpB  
WbpD  
PorR  
PorS  
"sulfotransferase"  
VimA  
VimE  
Glycosyl transferase  
Glycosyl transferase  
acyltransferase  
KDO synthase?

<https://www.ncbi.nlm.nih.gov/nucore/VAUO01000004.1?report=graph&from=130421&to=131380&strand=true>

# Aeromonas veronii strain FC951 chromosome, complete genome

GenBank: CP032839.1

[GenBank](#) [FASTA](#)

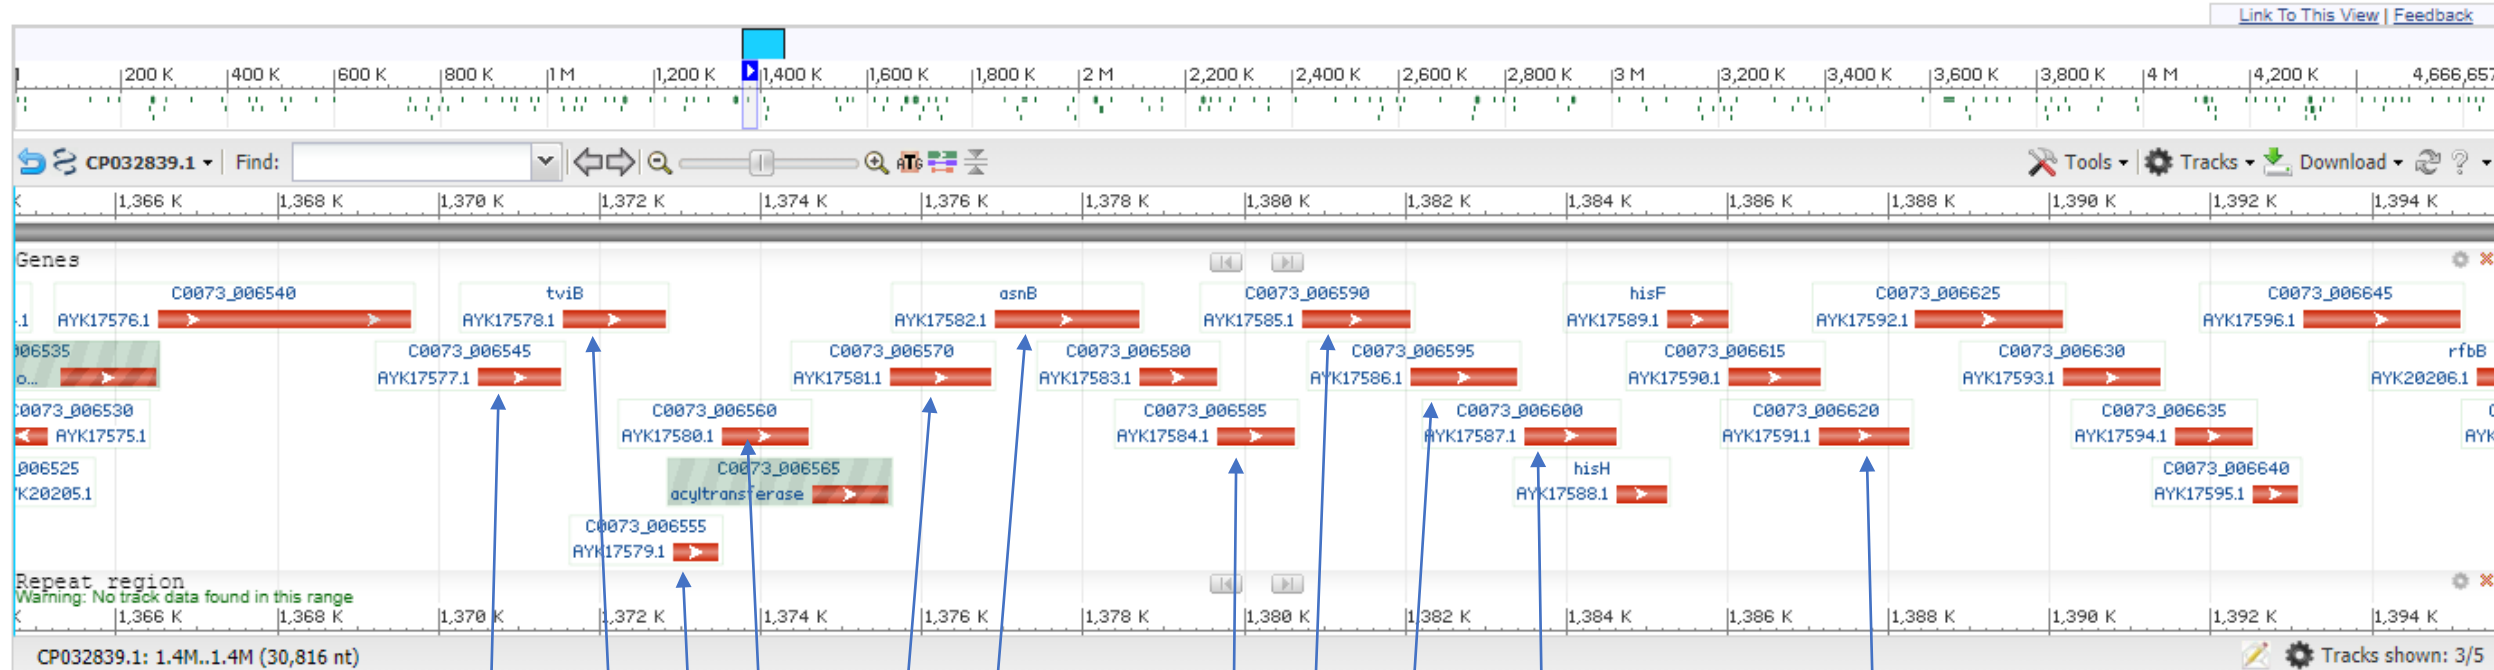

Rhombosortase =  
C0073\_012080

[https://www.ncbi.nlm.nih.gov/nuccore/CP032839.1?report=graph&log\\$=seqview&from=1379665&to=1380627](https://www.ncbi.nlm.nih.gov/nuccore/CP032839.1?report=graph&log$=seqview&from=1379665&to=1380627)

# Vibrio cholerae strain S12 VCS12\_contig000003\_Vibrio\_cholerae\_strain\_S-12, whole genome shotgun sequence

GenBank: MDST01000003.1

[GenBank](#) [FASTA](#)

[Link To This View](#) | [Feedback](#)

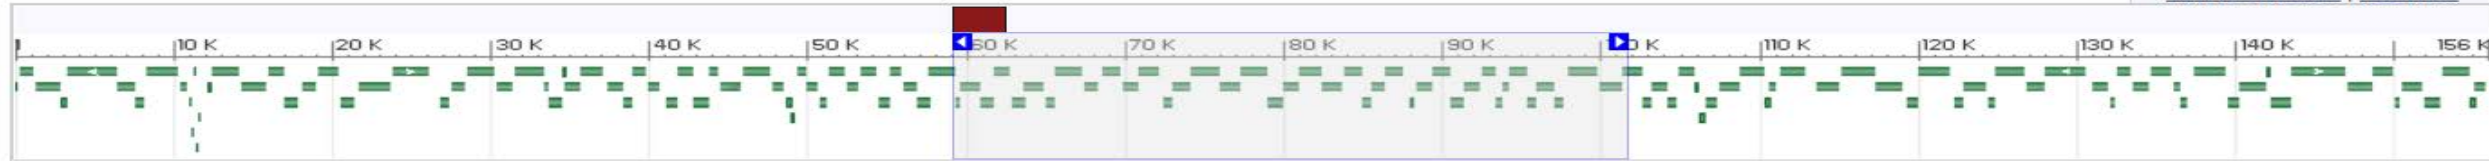

MDST01000003.1 Find: [ ] Tools Tracks Download

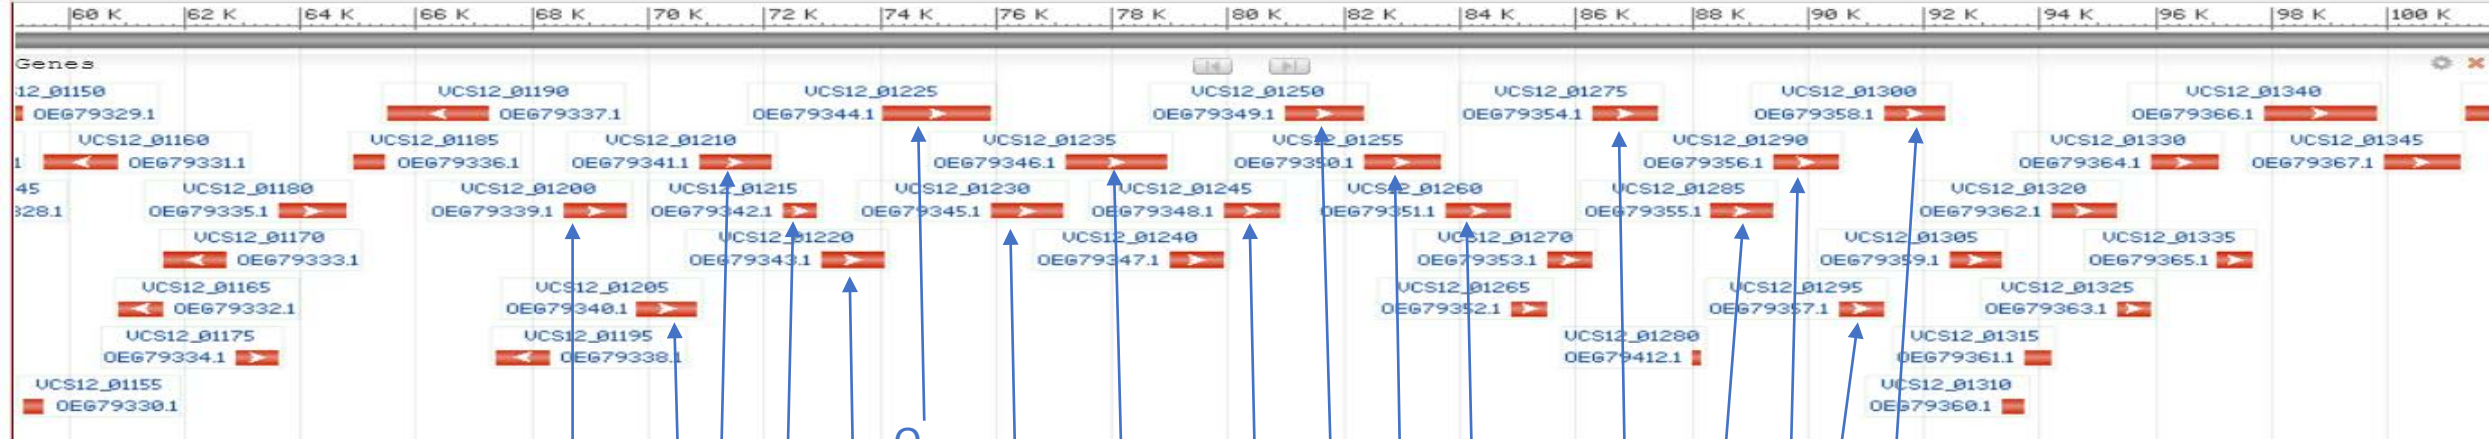

More LPS genes

PS chain length

WbpA  
WbpB  
WbpD

PorR

O-  
acetylase  
PS export

AsnB

VimA

VimE  
Oligosaccharide polymerase

WbuB  
Glycosyl transferase

WbuX

epimerase

Glycosyl transferase

Glc  
dehydratase

Rhombosortase  
= VCS12\_09380

<https://www.ncbi.nlm.nih.gov/nuccore/MDST01000003.1?report=graph&from=79938&to=80900>
