# Supplementary material for: Type IX Secretion System Cargo Proteins Are Glycosylated at the C Terminus with a Novel Linking Sugar of the Wbp/Vim Pathway
Source: PubMed Central journal article supplement (PMC7468200; doi:10.1128/mbio.01497-20), 2020-09-01
Supplement: mBio.01497-20-st002.pdf [file mBio.01497-20-st002.pdf]

**Table S2: Primers used in this study.**

| Name           | Sequence <sup>a</sup>                                                         |
|----------------|-------------------------------------------------------------------------------|
| PGN1234upFw    | <u>GCATGCT</u> GGCCGAACAGAAGAATACCCGAC (Underline indicates SphI site)        |
| PGN1234upRev   | <u>GGATCCG</u> GCACGTTGGAATACGACAGCCCA (Underline indicates BamHI site)       |
| PGN1234dwFw    | <u>CTGCAGT</u> GTATATCAGGCCAAGCAAAGCCA (Underline indicates PstI site)        |
| PGN1234dwRev   | <u>GAGCTC</u> GTTTCCTGAGAGCTTCTCACTTGG (Underline indicates SacI site)        |
| PGN1234compFw  | <u>GTCGACAT</u> GAAAATAGTCTCAGACTTCACT (Underline indicates SalI site)        |
| PGN1234compRev | <u>TCTAGATT</u> AGAGAGGCAGAGGGCGGTCAAT (Underline indicates XbaI site)        |
| mfa1-Fw        | <u>GCATGCT</u> TCTCATTGGGCTTTGCTTCT (Underline indicates SphI site)           |
| mfa1-R         | <u>GGATCCG</u> CATCAAAGTCTGCTGCATT (Underline indicates BamHI site)           |
| mfa2-F         | <u>GGATCCCTGCAGAT</u> GGCGCGGATCAGTATA (Underline indicates BamHI-PstI sites) |
| mfa2-R         | <u>GAGCTCAT</u> CAACCAGCCGTTTATCCA (Underline indicates SacI site)            |
| Pcat-F         | <u>GGTACCTT</u> CGTCGTC AATCAGCATCCCAG (Underline indicates KpnI site)        |
| Pcat-R         | CGGGACATTGTTTTGTCTCTTATTTAAGTTA                                               |
| TfvimA-F       | ACAAAACAATGTCCCGCAAAGAACTTATCGTACAT                                           |
| TfvimA-R       | <u>GCGGCCG</u> CTCATCTCGTTTGCGCCATTTG (Underline indicates NotI site)         |

<sup>a</sup>Underlined sequence represents non-homologous sequence for introduction of restriction sites.
