# Supplementary material for: Type IX Secretion System Cargo Proteins Are Glycosylated at the C Terminus with a Novel Linking Sugar of the Wbp/Vim Pathway
Source: PubMed Central journal article supplement (PMC7468200; doi:10.1128/mbio.01497-20), 2020-09-01
Supplement: mBio.01497-20-st003.pdf [file mBio.01497-20-st003.pdf]

**Table S3. PGN\_1234 PSI-BLAST matches to WbpS and WbqG compared to AsnB**

| Species              | <sup>a</sup> NCBI | <sup>b</sup> Uniprot | Name | <sup>c</sup> E-value | <sup>d</sup> % cov, % id | <sup>e</sup> CD top hit |
|----------------------|-------------------|----------------------|------|----------------------|--------------------------|-------------------------|
| <i>P. aeruginosa</i> | WP_012613869.1    | Q9RHD2_PSEAI         | WbpS | 6E <sup>-79</sup>    | 92, 17.3                 | eps_aminotran_1         |
| <i>E. coli</i>       | WP_032178609.1    | J3RWI0_ECOLX         | WbqG | 6E <sup>-76</sup>    | 97, 17.2                 | eps_aminotran_1         |
| <i>P. aeruginosa</i> | WP_003115546.1    | Q9I231_PSEAE         | AsnB | 3E <sup>-61</sup>    | 88, 14.3                 | AsnB                    |
| <i>E. coli</i>       | WP_000337077.1    | ASNB_ECOLI           | AsnB | 1E <sup>-43</sup>    | 92, 15.1                 | AsnB                    |

BLAST settings: PSI-BLAST, 2 iterations; taxonomy = gamma proteobacteria; max # hits = 10,000; Database = NCBI nr; Input sequence = PGN\_1234.

<sup>a</sup>The NCBI accessions are non-redundant sequences that match to the same protein from many different strains.

<sup>b</sup>The uniprot accessions are unique and match the protein name provided

<sup>c</sup>E-value = Expect Value

<sup>d</sup>% cov = coverage of sequence (%); % id = level of sequence identity (%)

<sup>e</sup>The top hit to the conserved domain database (<https://www.ncbi.nlm.nih.gov/Structure/cdd/wrpsb.cgi>)
